# Supplementary material for: Parallel kinetic resolution of tert-butyl (RS)-3-oxy-substituted cyclopent-1-ene-carboxylates for the asymmetric synthesis of 3-oxy-substituted cispentacin and transpentacin derivatives
Source: Royal Society of Chemistry journal article supplement (doi:10.1039/b802428f), 2008-01-01
Supplement: b802428f.pdf [file b802428f.pdf]

## Supplementary Information

### Parallel kinetic resolution of *tert*-butyl (*RS*)-3-oxy-substituted cyclopent-1-ene-carboxylates for the asymmetric synthesis of 3-oxy-substituted cispentacin and transpentacin derivatives

Yimon Aye, Stephen G. Davies,\* A. Christopher Garner, Paul M. Roberts, Andrew D. Smith and James E. Thomson

*Department of Chemistry, Chemistry Research Laboratory, University of Oxford, Mansfield Road, Oxford, OX1 3TA, UK.*

E-mail: steve.davies@chem.ox.ac.uk

### Experimental

#### General Experimental

All reactions involving organometallic or other moisture-sensitive reagents were carried out under a nitrogen or argon atmosphere using standard vacuum line techniques and glassware that was flame dried and cooled under nitrogen before use. Solvents were dried according to the procedure outlined by Grubbs and co-workers.<sup>1</sup> Water was purified by an Elix<sup>®</sup> UV-10 system. All other solvents were used as supplied (analytical or HPLC grade) without prior purification. Organic layers were dried over MgSO<sub>4</sub>. Thin layer chromatography was performed on aluminium plates coated with 60 F<sub>254</sub> silica. Plates were visualised using UV light (254 nm), iodine, 1% aq KMnO<sub>4</sub>, or 10% ethanolic phosphomolybdic acid. Flash column chromatography was performed on Kieselgel 60 silica.

Elemental analyses were recorded by the microanalysis service of the Inorganic Chemistry Laboratory, University of Oxford, UK. Melting points were recorded on a Gallenkamp Hot Stage apparatus and are uncorrected. Optical rotations were recorded on a Perkin-Elmer 241 polarimeter with a water-jacketed 10 cm cell. Specific rotations are reported in 10<sup>-1</sup> deg cm<sup>2</sup> g<sup>-1</sup> and concentrations in g/100 mL. IR spectra were recorded on Bruker Tensor 27 FT-IR spectrometer as either a thin film on NaCl plates (film) or a KBr disc (KBr), as stated. Selected characteristic peaks are reported in cm<sup>-1</sup>. NMR spectra were recorded on Bruker Avance spectrometers in the deuterated solvent stated. The field was locked by external referencing to the relevant deuteron resonance. Low-resolution mass spectra were recorded on either a VG MassLab 20-250 or a Micromass Platform 1 spectrometer. Accurate mass measurements were run on either a Bruker

---

<sup>1</sup> A. B. Pangborn, M. A. Giardello, R. H. Grubbs, R. K. Rosen and F. J. Timmers, *Organometallics*, **1996**, *15*, 1518.

MicroTOF, and were internally calibrated with polyaniline, or a Micromass GCT instrument fitted with a Scientific Glass Instruments BPX5 column (15 m × 0.25 mm) using amyl acetate as a lock mass.

## General Procedures

### General procedure 1a: lithium amide conjugate addition to $\alpha,\beta$ -unsaturated esters

BuLi (as a solution in hexanes) was added dropwise *via* syringe to a stirred solution of the requisite amine in THF at  $-78\text{ }^{\circ}\text{C}$ . After stirring for 30 min a solution of the requisite  $\alpha,\beta$ -unsaturated ester in THF at  $-78\text{ }^{\circ}\text{C}$  was added dropwise *via* cannula. After stirring for a further 4 h at  $-78\text{ }^{\circ}\text{C}$  the reaction mixture was quenched with sat aq  $\text{NH}_4\text{Cl}$ , allowed to warm to rt and stirred for 5 min before being concentrated *in vacuo*. The residue was partitioned between DCM (50 mL) and 10% aq citric acid (10 mL). The organic layer was separated and the aqueous layer was extracted with DCM ( $2 \times 50\text{ mL}$ ). The combined organic extracts were washed sequentially with sat aq  $\text{NaHCO}_3$  (50 mL) and brine (50 mL), dried and concentrated *in vacuo*.

### General procedure 1b: lithium amide conjugate addition to $\alpha,\beta$ -unsaturated esters

BuLi (as a solution in hexanes) was added dropwise *via* syringe to a stirred solution of the requisite amine in THF at  $-78\text{ }^{\circ}\text{C}$ . After stirring for 30 min a solution of the requisite  $\alpha,\beta$ -unsaturated ester in THF at  $-78\text{ }^{\circ}\text{C}$  was added dropwise *via* cannula. After stirring for a further 4 h at  $-78\text{ }^{\circ}\text{C}$  the reaction mixture was quenched with a solution of 2,6-di-*tert*-butylphenol in THF and allowed to warm to rt over 1 h before being concentrated *in vacuo*. The residue was partitioned between DCM (50 mL) and 10% aq citric acid (10 mL). The organic layer was separated and the aqueous layer was extracted with DCM ( $2 \times 50\text{ mL}$ ). The combined organic extracts were washed sequentially with sat aq  $\text{NaHCO}_3$  (50 mL) and brine (50 mL), dried and concentrated *in vacuo*.

### General Procedure 2: base catalysed epimerisation

A catalytic amount of  $\text{KO}^t\text{Bu}$  was added to the  $\beta$ -amino ester in  $^t\text{BuOH/THF}$  (1:1). The mixture was refluxed overnight before addition of sat aq  $\text{NH}_4\text{Cl}$ , separation and extraction of the aqueous layer with DCM. The combined organic phases were dried and concentrated *in vacuo*.

### General Procedure 3: DDQ deprotection of *N*-3,4-dimethoxybenzyl derivatives

DDQ was added to a solution of the requisite *N*-3,4-dimethoxybenzyl protected  $\beta$ -amino ester in DCM/H<sub>2</sub>O (5:1). The reaction mixture was stirred at rt for 48 h before the addition of sat aq NaHCO<sub>3</sub>. The mixture was extracted with DCM and the combined organic extracts were washed with brine, dried and concentrated *in vacuo*.

### General Procedure 4: hydrogenolysis

Pd(OH)<sub>2</sub>/C was added to a solution of the secondary or tertiary amine in degassed MeOH at rt and placed under a hydrogen atmosphere (5 atm). After stirring for 24 h, the reaction mixture was filtered through basic alumina (eluent MeOH) and concentrated *in vacuo*.

### General Procedure 5: *tert*-butyl ester hydrolysis

TFA was added to a solution of the  $\beta$ -amino ester in DCM at rt and stirred for 16 h. The reaction mixture was then concentrated *in vacuo*. The residue was dissolved in MeOH (2 mL) and HCl in Et<sub>2</sub>O (sat, 2 mL) was added, and the mixture was concentrated *in vacuo*. The residue was partitioned between Et<sub>2</sub>O (4 mL) and H<sub>2</sub>O (4 mL), and the layers separated. The aqueous layer was concentrated to a quarter of its volume and subjected to ion exchange chromatography on Dowex 50WX8-200 resin.

### Methyl 3-oxo-cyclopent-1-ene-carboxylate **14**

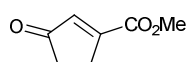

CrO<sub>3</sub> (4.82 g, 48.2 mmol) was added slowly to acetic anhydride (33 mL). When all of the CrO<sub>3</sub> was dissolved, glacial acetic acid (250 mL) was added. The resultant solution was added dropwise to a stirred, cooled (0-5 °C) solution of **12** (13.9 g, 110 mmol) in DCM (240 mL), then a second portion of DCM (24 mL) was added to the reaction mixture and stirring was continued for a further 30 min at 0-5 °C. The reaction was neutralised with 12.5 M KOH (5 mL), then aqueous layer was separated and extracted with DCM. The combined organic extracts were washed sequentially with sat aq NaHCO<sub>3</sub> and brine, then dried and concentrated *in vacuo*. The crude yellow oil was stirred in a mixture of THF/sat aq NaHCO<sub>3</sub> overnight. Purification by chromatography (20% Et<sub>2</sub>O in pentane) gave **14** as a colourless oil (9.26 g, 60%);  $\delta_{\text{H}}$  (400 MHz, CDCl<sub>3</sub>) 2.53-2.55 (2H, m, C(5)H<sub>2</sub>), 2.87-2.88 (2H, m, C(4)H<sub>2</sub>), 3.87 (3H, s, OMe), 6.76 (1H, t, *J* 2.3, C(2)H).

### ***tert*-Butyl 3-oxo-cyclopent-1-ene-carboxylate **15****

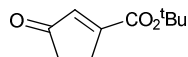

*Oxidation with CrO<sub>3</sub>*: CrO<sub>3</sub> (18.1 g, 180 mmol) was added slowly to acetic anhydride (45 mL). When all of the CrO<sub>3</sub> was dissolved, glacial acetic acid (90 mL) was added. The resultant solution was added dropwise to a stirred, cooled (0-5 °C) solution of **13** (10 g, 59.5 mmol) in DCM (90 mL), then a second portion of DCM (90 mL) was added to the reaction mixture and stirring was continued for a further 30 min at 0-5 °C. The reaction was neutralised with 12.5 M KOH (10 mL), then the aqueous layer was separated and extracted with DCM. The combined organic extracts were washed sequentially with sat aq NaHCO<sub>3</sub> and brine, then dried and concentrated *in vacuo*. The crude yellow oil was stirred in a mixture of THF/sat aq NaHCO<sub>3</sub> overnight. Purification by chromatography (20% Et<sub>2</sub>O in pentane) gave **15** as a colourless oil (5.44 g, 50%);  $\nu_{\max}$  (film) 1716 (C=O), 1613 (C=C);  $\delta_{\text{H}}$  (400 MHz, CDCl<sub>3</sub>) 1.55 (9H, s, CMe<sub>3</sub>), 2.51-2.53 (2H, m, C(4)H<sub>2</sub>), 2.80-2.83 (2H, m, C(5)H<sub>2</sub>), 6.65-6.69 (1H, m, C(2)H);  $\delta_{\text{C}}$  (100 MHz, CDCl<sub>3</sub>) 27.5, 28.0, 35.7, 82.5, 137.4, 163.5, 166.5, 209.4;  $m/z$  (ESI<sup>+</sup>) 183 ([M+H]<sup>+</sup>, 100%); HRMS (ESI<sup>+</sup>) found 183.1023; C<sub>10</sub>H<sub>15</sub>O<sub>3</sub> ([M+H]<sup>+</sup>) requires 183.1021.

*Oxidation with tert-butyl hydroperoxide*: *tert*-butyl hydroperoxide (5-6 M in decane, 10.8 mL) was added dropwise to a mixture of **13** (5 g, 29.7 mmol), Pd(OH)<sub>2</sub>/C (1.04 mg, 1.49 mmol) and K<sub>2</sub>CO<sub>3</sub> (2.05 g, 14.9 mmol) in DCM (200 mL) at 0 °C and the resultant solution stirred for 4 h at 0 °C under N<sub>2</sub>. Further *tert*-butyl hydroperoxide (5-6 M in decane, 43.2 mL) was added and stirring was continued for a further 18 h. The reaction mixture was filtered through a short pad of silica (eluent DCM), dried and concentrated *in vacuo*. Purification by chromatography (2% Et<sub>2</sub>O in pentane) gave **15** as a colourless oil (2.0 g, 37%).

### **Methyl (*RS*)-3-hydroxy-cyclopent-1-ene-carboxylate **16****

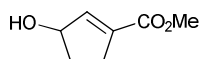

To a solution of **14** (5.53 g, 39.5 mmol) in MeOH (75 mL) at 0 °C was added CeCl<sub>3</sub>·7H<sub>2</sub>O (13.6 g, 36.6 mmol) followed by NaBH<sub>4</sub> (1.70 g, 45.0 mmol). The mixture was stirred for 10 min, quenched with 0.2 M aq HCl, and extracted with DCM. The combined organic extracts were washed with H<sub>2</sub>O, dried and concentrated *in vacuo*. Chromatography (30% Et<sub>2</sub>O in pentane) gave **16** as a colourless oil (5.50 g, 98%);  $\delta_{\text{H}}$  (400 MHz, CDCl<sub>3</sub>) 1.76-1.85 (1H, m, C(4)H<sub>A</sub>), 2.36-2.55 (2H, m, C(4)H<sub>B</sub>, C(5)H<sub>A</sub>), 2.63-2.79 (1H, m, C(5)H<sub>B</sub>), 3.77 (3H, s, OMe), 4.45-5.01 (1H, m, C(3)H), 6.71 (1H, app q, *J* 2.0, C(2)H).

### ***tert*-Butyl (*RS*)-3-hydroxy-cyclopent-1-ene-carboxylate **17****

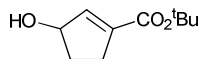

To a solution of **15** (5.50 g, 30.2 mmol) in MeOH (20 mL) at 0 °C was added CeCl<sub>3</sub>·7H<sub>2</sub>O (10.4 g, 28.0 mmol) followed by NaBH<sub>4</sub> (1.30 g, 34.4 mmol). The mixture was stirred for 10 min, quenched with 0.2 M aq HCl, and extracted with DCM. The combined organic extracts were washed with H<sub>2</sub>O, dried and concentrated *in vacuo*. Chromatography (30% Et<sub>2</sub>O in pentane) gave **17** as a colourless oil (5.35 g, 98%);  $\nu_{\max}$  (film) 3404 (O–H), 1711 (C=O), 1634 (C=C);  $\delta_{\text{H}}$  (400 MHz, CDCl<sub>3</sub>) 1.49 (9H, s, CMe<sub>3</sub>), 1.74-1.83 (1H, m, C(4)*H*<sub>A</sub>), 2.34-2.49 (2H, m, C(4)*H*<sub>B</sub>, C(5)*H*<sub>A</sub>), 2.62-2.73 (1H, m, C(5)*H*<sub>B</sub>), 4.95 (1H, br s, C(3)*H*), 6.59-6.60 (1H, m, C(2)*H*);  $\delta_{\text{C}}$  (100 MHz, CDCl<sub>3</sub>) 28.1, 29.9, 33.6, 77.2, 80.7, 140.7, 141.7, 164.6;  $m/z$  (CI<sup>+</sup>) 202 ([M+NH<sub>4</sub>]<sup>+</sup>, 100%); HRMS (CI<sup>+</sup>) found 202.1438; C<sub>10</sub>H<sub>20</sub>NO<sub>3</sub> ([M+NH<sub>4</sub>]<sup>+</sup>) requires 202.1443.

### **Methyl (*RS*)-3-methoxy-cyclopent-1-ene-carboxylate **18****

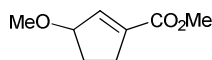

MeI (1.40 mL, 22.5 mmol) was added to a mixture of **16** (160 mg, 1.13 mmol) and silver(I) oxide (522 mg, 2.25 mmol) in MeCN (1.5 mL) and the resultant mixture refluxed at 43 °C for 20 h. The solid residue was filtered through Celite<sup>®</sup> (eluent MeCN) and filtrate was concentrated *in vacuo*. Purification by chromatography (3% Et<sub>2</sub>O in pentane) gave **18** as a colourless oil (150 mg, 88%);  $\nu_{\max}$  (film) 1723 (C=O), 1636 (C=C);  $\delta_{\text{H}}$  (400 MHz, CDCl<sub>3</sub>) 1.82-1.91 (1H, m, C(4)*H*<sub>A</sub>), 2.25-2.33 (1H, m, C(4)*H*<sub>B</sub>), 2.44-2.52 (1H, m, C(5)*H*<sub>A</sub>), 2.67-2.76 (1H, m, C(5)*H*<sub>B</sub>), 3.36 (3H, s, C(3)OMe), 3.76 (1H, s, CO<sub>2</sub>Me), 4.53-4.57 (1H, m, C(3)*H*), 6.78-6.80 (1H, m, C(2)*H*);  $\delta_{\text{C}}$  (100 MHz, CDCl<sub>3</sub>) 29.9, 51.7, 56.4, 85.5, 139.3, 140.5, 165.5;  $m/z$  (CI<sup>+</sup>) 156 ([M+H]<sup>+</sup>, 100%); HRMS (CI<sup>+</sup>) found 157.0864; C<sub>8</sub>H<sub>12</sub>O<sub>3</sub> ([M+H]<sup>+</sup>) requires 157.0865.

### ***tert*-Butyl (*RS*)-3-methoxy-cyclopent-1-ene-carboxylate **19****

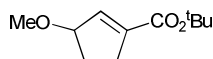

MeI (16.9 mL, 272 mmol) was added to a mixture of **17** (2.50 g, 13.6 mmol) and silver(I) oxide (6.29 g, 27.2 mmol) in MeCN (20 mL) and the resultant mixture refluxed at 43 °C for 20 h. The solid residue was filtered through Celite<sup>®</sup> (eluent MeCN) and the filtrate was concentrated *in vacuo*. Purification by chromatography (3% Et<sub>2</sub>O in pentane) gave **19** as a colourless oil (2.29 g, 85%);  $\nu_{\max}$  (film) 1713 (C=O), 1635 (C=C);  $\delta_{\text{H}}$  (400 MHz, CDCl<sub>3</sub>) 1.49 (9H, s, CMe<sub>3</sub>), 1.82-1.88 (1H, m, C(4)*H*<sub>A</sub>), 2.23-2.29 (1H, m,

C(4) $H_B$ ), 2.40-2.47 (1H, m, C(5) $H_A$ ), 2.58-2.69 (1H, m, C(5) $H_B$ ), 3.35 (3H, s, OMe), 4.51-4.53 (1H, m, C(3) $H$ ), 6.60 (1H, app dd,  $J$  2.2, 1.9, C(2) $H$ );  $\delta_C$  (100 MHz, CDCl<sub>3</sub>) 27.8, 28.0, 29.8, 56.3, 80.4, 85.5, 139.0, 141.3, 164.4;  $m/z$  (CI<sup>+</sup>) 199 ([M+H]<sup>+</sup>, 100%); HRMS (CI<sup>+</sup>) found 199.1331; C<sub>8</sub>H<sub>12</sub>O<sub>3</sub> ([M+H]<sup>+</sup>) requires 199.1334.

### Methyl (*RS*)-3-*tert*-butyldiphenylsilyloxy-cyclopent-1-ene-carboxylate **20**

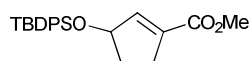

TBDPSCl (1.67 g, 6.40 mmol) was added dropwise to a stirred solution of **16** (827 mg, 5.82 mmol), imidazole (495 mg, 7.27 mmol) and DMAP (~20 mg) in dry DMF (8 mL) at 0 °C. The reaction mixture was allowed to warm to rt and stirred overnight. The reaction was quenched by the addition of H<sub>2</sub>O, and the aqueous layer was extracted with Et<sub>2</sub>O. The combined organic layers were washed several times with H<sub>2</sub>O, dried and concentrated *in vacuo*. Purification by chromatography (5% Et<sub>2</sub>O in pentane) gave **20** as a colourless oil (379 mg, 99%);  $\nu_{\max}$  (film) 1722 (C=O), 1630 (C=C);  $\delta_H$  (400 MHz, CDCl<sub>3</sub>) 1.07 (9H, s, CMe<sub>3</sub>), 1.86-1.94 (1H, m, C(4) $H_A$ ), 2.13-21.21 (1H, m, C(4) $H_B$ ), 2.30-2.39 (1H, m, C(5) $H_A$ ), 2.65-2.73 (1H, m, C(5) $H_B$ ), 3.74 (3H, s, OMe), 4.93-4.98 (1H, m, C(3) $H$ ), 6.58 (1H, app q,  $J$  2.0, C(2) $H$ ), 7.38-7.47 (5H, m, Ph), 7.68-7.70 (5H, m, Ph);  $\delta_C$  (400 MHz, CDCl<sub>3</sub>) 19.1, 26.9, 29.8, 33.9, 51.6, 78.4, 127.6, 127.7, 129.7, 133.9, 135.7, 137.3, 143.9, 165.7;  $m/z$  (CI<sup>+</sup>) 381 ([M+NH<sub>4</sub>]<sup>+</sup>); HRMS (CI<sup>+</sup>) found 398.2143; C<sub>23</sub>H<sub>32</sub>NO<sub>3</sub>Si ([M+NH<sub>4</sub>]<sup>+</sup>) requires 398.2151.

### *tert*-Butyl (*RS*)-3-*tert*-butyldiphenylsilyloxy-cyclopent-1-ene-carboxylate **21**

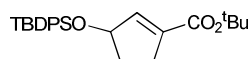

TBDPSCl (3.11 mL, 12.0 mmol) was added dropwise to a stirred solution of **17** (2 g, 10.8 mmol), imidazole (924 mg, 13.6 mmol) and DMAP (~20 mg) in dry DMF (20 mL) at 0 °C. The reaction mixture was allowed to warm to rt and stirred overnight. The reaction was quenched by the addition of H<sub>2</sub>O, and the aqueous layer was extracted with Et<sub>2</sub>O. The combined organic layers were washed several times, with H<sub>2</sub>O, dried and concentrated *in vacuo*. Purification by chromatography (1% Et<sub>2</sub>O in pentane) gave **21** as a white crystalline solid (3.90 g, 85%); Found C, 73.7; H, 8.1%; C<sub>26</sub>H<sub>34</sub>O<sub>3</sub>Si requires C, 73.9; H, 8.1%; mp 50-51 °C;  $\nu_{\max}$  (film) 1712 (C=O), 1639 (C=C);  $\delta_H$  (400 MHz, CDCl<sub>3</sub>) 1.07 (9H, s, SiCMe<sub>3</sub>), 1.48 (9H, s, OCM<sub>3</sub>), 1.85-1.89 (1H, m, C(4) $H_A$ ), 2.12-2.16 (1H, m, C(4) $H_B$ ), 2.23-2.32 (1H, m, C(5) $H_A$ ), 2.59-2.67 (1H, m, C(5) $H_B$ ), 4.92-4.96 (1H, m, C(3) $H$ ), 6.44 (1H, app q,  $J$  2.0, C(2) $H$ ), 7.38-7.78 (10H, m, Ph);  $\delta_C$  (100 MHz, CDCl<sub>3</sub>) 19.1, 26.9,

28.1, 29.8, 34.0, 78.5, 80.4, 127.7, 127.9, 129.7, 130.3, 132.5, 134.0, 135.2, 135.7, 135.8, 139.3, 142.7, 164.7;  $m/z$  ( $\text{ESI}^+$ ) 440 ( $[\text{M}+\text{H}]^+$ , 100%); HRMS ( $\text{ESI}^+$ ) found 440.2622;  $\text{C}_{26}\text{H}_{35}\text{O}_3\text{Si}$  ( $[\text{M}+\text{H}]^+$ ) requires 440.2621.

***N,N*-Dibenzyl (1*RS*,2*RS*,3*RS*)-2-*N,N*-dibenzylamino-3-*tert*-butyldiphenylsilyloxy-cyclopentane-carboxamide **23** and *N,N*-dibenzyl (*RS*)-3-*tert*-butyldiphenylsilyloxy-cyclopent-1-ene-carboxamide **24****

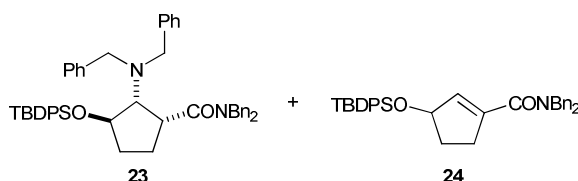

Following *General Procedure 1a*, BuLi (2.5 M in hexanes, 0.43 mL, 1.02 mmol), dibenzylamine (0.20 mL, 1.05 mmol) in THF (0.4 mL) and **20** (200 mg, 0.53 mmol) in THF (0.3 mL) gave a 58:42 mixture of **23**:**24**. Purification by chromatography (1% Et<sub>2</sub>O in pentane) gave **23** as a white crystalline solid (110 mg, 28%, >98% de); mp 118-119 °C;  $\nu_{\text{max}}$  (KBr) 1646 (C=O);  $\delta_{\text{H}}$  (400 MHz, CDCl<sub>3</sub>) 1.05 (9H, s,  $\text{CMe}_3$ ), 1.41-1.54 (1H, m, C(4) $H_{\text{A}}$ ), 1.64-1.78 (1H, m, C(5) $H_{\text{A}}$ ), 1.84-1.94 (1H, m, C(4) $H_{\text{B}}$ ), 2.15-2.26 (1H, m, C(5) $H_{\text{B}}$ ), 3.15 (1H, app q,  $J$  8.9, C(1) $H$ ), 3.43 (2H, d,  $J$  13.0, N( $\text{CH}_{\text{A}}\text{H}_{\text{B}}\text{Ph}$ )<sub>2</sub>), 3.56 (1H, dd,  $J$  4.4, 4.8, C(2) $H$ ), 3.83 (2H, d,  $J$  13.0, N( $\text{CH}_{\text{A}}\text{H}_{\text{B}}\text{Ph}$ )<sub>2</sub>), 3.95 (1H, d,  $J$  17.8, CON $\text{CH}_{\text{A}}\text{H}_{\text{B}}\text{Ph}$ ), 4.09 (1H, d,  $J$  14.3, CON $\text{CH}_{\text{C}}\text{H}_{\text{D}}\text{Ph}$ ), 4.34 (1H, d,  $J$  17.8, CON $\text{CH}_{\text{A}}\text{H}_{\text{B}}\text{Ph}$ ), 4.92-4.96 (1H, app q,  $J$  5.5, C(3) $H$ ), 5.25 (1H, d,  $J$  14.3, CON $\text{CH}_{\text{C}}\text{H}_{\text{D}}\text{Ph}$ ), 6.97-7.74 (30H, m,  $\text{Ph}$ );  $\delta_{\text{C}}$  (100 MHz, CDCl<sub>3</sub>) 19.2, 27.0, 27.5, 33.3, 44.1, 44.4, 44.9, 55.6, 69.8, 75.3, 126.1, 126.6, 127.2, 127.5, 127.7, 128.0, 128.4, 128.7, 128.8, 129.5, 129.6, 129.7, 132.9, 134.6, 135.9, 137.0, 174.1;  $m/z$  ( $\text{ESI}^+$ ) 743 ( $[\text{M}+\text{H}]^+$ , 100%); HRMS ( $\text{ESI}^+$ ) found 743.4039;  $\text{C}_{50}\text{H}_{55}\text{N}_2\text{O}_2\text{Si}$  ( $[\text{M}+\text{H}]^+$ ) requires 743.4033. Further elution gave **24** as a colourless oil (60 mg, 21%);  $\nu_{\text{max}}$  (film) 1612 (C=O), 1581 (C=C);  $\delta_{\text{H}}$  (400 MHz, CDCl<sub>3</sub>) 1.00 (9H, s,  $\text{CMe}_3$ ), 1.86-1.94 (1H, m, C(4) $H_{\text{A}}$ ), 2.14-2.22 (1H, m, C(4) $H_{\text{B}}$ ), 2.54-2.61 (1H, m, C(5) $H_{\text{A}}$ ), 2.72-2.80 (1H, m, C(5) $H_{\text{B}}$ ), 4.43-4.56 (3H, m, N $\text{CH}_2\text{Ph}$ , N $\text{CH}_{\text{A}}\text{H}_{\text{B}}\text{Ph}$ ), 4.70 (1H, d,  $J$  14.7, N $\text{CH}_{\text{A}}\text{H}_{\text{B}}\text{Ph}$ ), 4.89-4.92 (1H, m, C(3) $H$ ), 5.73-5.75 (1H, m, C(2) $H$ ), 7.15-7.63 (20H, m,  $\text{Ph}$ );  $\delta_{\text{C}}$  (100 MHz, CDCl<sub>3</sub>) 19.0, 26.8, 32.9, 33.3, 36.9, 50.8, 79.0, 133.9, 126.9, 127.6, 128.4, 128.6, 128.9, 129.6, 130.0, 133.5, 134.1, 135.6, 136.6, 140.0, 169.7;  $m/z$  ( $\text{ESI}^+$ ) 546 ( $[\text{M}+\text{H}]^+$ , 100%); HRMS ( $\text{ESI}^+$ ) found 546.2849;  $\text{C}_{36}\text{H}_{40}\text{NO}_2\text{Si}$  ( $[\text{M}+\text{H}]^+$ ) requires 546.2828.

**X-ray Crystal Structure Determination for **23****

Data were collected using an Enraf-Nonius  $\kappa$ -CCD diffractometer with graphite monochromated Mo- $K\alpha$  radiation using standard procedures at 190 K. The structure was solved by direct methods (SIR92); all non-

hydrogen atoms were refined with anisotropic thermal parameters. Hydrogen atoms were added at idealised positions. The structure was refined using CRYSTALS.<sup>2</sup>

X-ray crystal structure data for **23** [C<sub>50</sub>H<sub>54</sub>N<sub>2</sub>O<sub>2</sub>Si]:  $M = 743.08$ , monoclinic, space group  $C 1 2/c 1$ ,  $a = 32.1772(6)$  Å,  $b = 16.8013(4)$  Å,  $c = 17.4982(4)$  Å,  $\beta = 116.7552(8)^\circ$ ,  $V = 8447.1(3)$  Å<sup>3</sup>,  $Z = 8$ ,  $\mu = 0.097$  mm<sup>-1</sup>, colourless block, crystal dimensions =  $0.1 \times 0.1 \times 0.1$  mm<sup>3</sup>. A total of 9360 unique reflections were measured for  $5 < \theta < 27$  and 5328 reflections were used in the refinement. The final parameters were  $wR_2 = 0.058$  and  $R_1 = 0.049$  [ $I > 3\sigma(I)$ ]. Crystallographic data (excluding structure factors) has been deposited with the Cambridge Crystallographic Data Centre as supplementary publication number CCDC 669233. Copies of the data can be obtained, free of charge, on application to CCDC, 12 Union Road, Cambridge CB2 1EZ, UK [fax: +44(0)-1223-336033 or e-mail: deposit@ccdc.cam.ac.uk].

***tert*-Butyl (1*RS*,2*RS*,3*RS*)- and (1*RS*,2*SR*,3*SR*)-2-*N,N*-dibenzylamino-3-methoxy-cyclopentane-carboxylate (1*RS*,2*RS*,3*RS*)-**25** and (1*RS*,2*SR*,3*SR*)-**26****

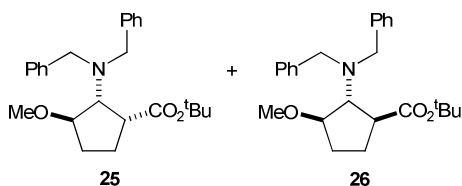

Following *General Procedure 1a*, BuLi (1.6 M in hexanes, 1.56 mL, 2.50 mmol), dibenzylamine (0.49 mL, 2.52 mmol) in THF (1 mL) and **19** (100 mg, 0.51 mmol) in THF (0.4 mL) gave a 79:21 mixture of **25**:**26**. Purification by chromatography (2% Et<sub>2</sub>O in pentane) gave **25** as a colourless oil (80 mg, 40%, >98% de);  $\nu_{\max}$  (film) 1725 (C=O);  $\delta_{\text{H}}$  (400 MHz, CDCl<sub>3</sub>) 1.53 (9H, s,  $CM_e_3$ ), 1.57-1.61 (1H, m, C(4) $H_A$ ), 1.88-1.94 (2H, m, C(5) $H_2$ ), 2.24-2.36 (1H, m, C(4) $H_B$ ), 3.05-3.09 (1H, m, C(1) $H$ ), 3.17 (3H, s,  $OMe$ ), 3.30-3.33 (1H, m, C(2) $H$ ), 3.73 (2H, d,  $J$  14.1, N( $CH_AH_BPh$ )<sub>2</sub>), 3.85 (2H, d,  $J$  14.1, N( $CH_AH_BPh$ )<sub>2</sub>), 4.09-4.13 (1H, m, C(3) $H$ ), 7.21-7.39 (10H, m,  $Ph$ );  $\delta_{\text{C}}$  (100 MHz, CDCl<sub>3</sub>) 25.6, 28.2, 29.2, 47.8, 55.4, 56.8, 69.1, 80.3, 82.5, 126.6, 128.0, 128.8, 139.8, 174.2;  $m/z$  (ESI<sup>+</sup>) 396 ([ $M+H$ ]<sup>+</sup>, 100%); HRMS (ESI<sup>+</sup>) found 396.2539; C<sub>25</sub>H<sub>34</sub>NO<sub>3</sub> ([ $M+H$ ]<sup>+</sup>) requires 396.2539. Further elution gave **26** as a colourless oil (20 mg, 10%, >98% de);  $\nu_{\max}$  (film) 1725 (C=O);  $\delta_{\text{H}}$  (400 MHz, CDCl<sub>3</sub>) 1.30 (9H, s,  $CM_e_3$ ), 1.68-2.02 (4H, m, C(4) $H_2$ , C(5) $H_2$ ), 2.74-2.78 (1H, m, C(1) $H$ ), 3.29 (3H, s,  $OMe$ ), 3.52-3.55 (1H, m, C(2) $H$ ), 3.67 (4H, s, N( $CH_2Ph$ )<sub>2</sub>), 3.78-3.86 (1H, m, C(3) $H$ ), 7.21-7.39 (10H, m,  $Ph$ ),  $\delta_{\text{C}}$  (100 MHz, CDCl<sub>3</sub>) 26.9, 28.0, 30.2, 45.9, 55.1, 56.8, 70.1, 83.0,

<sup>2</sup> P. W. Betteridge, J. R. Carruthers, R. I. Cooper, C. K. Prout and D. J. Watkin, CRYSTALS, 2001, Issue 11, Chemical Crystallography Laboratory, University of Oxford, UK.



83.2, 126.8, 128.0, 128.8, 139.8, 174.7;  $m/z$  (ESI<sup>+</sup>) 396 ([M+H]<sup>+</sup>, 100%); HRMS (ESI<sup>+</sup>) found 396.2531; C<sub>25</sub>H<sub>34</sub>NO<sub>3</sub> ([M+H]<sup>+</sup>) requires 396.2539.

***tert*-Butyl (1*RS*,2*RS*,3*RS*)- and (1*RS*,2*SR*,3*SR*)-2-*N,N*-dibenzylamino-3-*tert*-butyldiphenylsilyloxy-cyclopentane-carboxylate (1*RS*,2*RS*,3*RS*)-**27** and (1*RS*,2*SR*,3*SR*)-**28****

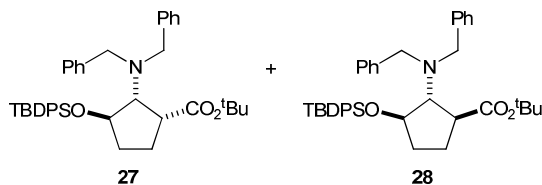

Following *General Procedure 1a*, BuLi (1.6 M in hexanes, 733  $\mu$ L, 1.17 mmol), dibenzylamine (0.23 mL, 1.18 mmol) in THF (0.6 mL) and **21** (100 mg, 0.24 mmol) in THF (0.2 mL) gave a 91:9 mixture of **27**:**28**. Purification by chromatography (2% Et<sub>2</sub>O in pentane) gave **27** as a colourless oil (108 mg, 74%, >98% de);  $\nu_{\max}$  (film) 1723 (C=O);  $\delta_{\text{H}}$  (400 MHz, CDCl<sub>3</sub>) 1.08 (9H, s, SiCMe<sub>3</sub>), 1.27-1.34 (2H, m, C(4)H<sub>2</sub>), 1.46 (9H, s, OCMe<sub>3</sub>), 1.76-1.83 (2H, m, C(5)H<sub>2</sub>), 3.00-3.05 (1H, m, C(1)H), 3.52-3.55 (1H, m, C(2)H), 3.68 (2H, d,  $J$  14.2, N(CH<sub>A</sub>H<sub>B</sub>Ph)<sub>2</sub>), 3.82 (2H, d,  $J$  14.2, N(CH<sub>A</sub>CH<sub>B</sub>Ph)<sub>2</sub>), 4.74-4.76 (1H, m, C(3)H), 7.21-7.71 (20H, m, Ph);  $\delta_{\text{C}}$  (100 MHz, CDCl<sub>3</sub>) 19.0, 25.4, 26.9, 28.1, 32.4, 46.5, 55.0, 70.4, 74.9, 80.2, 126.4, 127.3, 127.4, 127.9, 128.4, 129.4, 129.5, 133.9, 134.6, 135.8, 140.0, 174.2;  $m/z$  (ESI<sup>+</sup>) 620 ([M+H]<sup>+</sup>, 100%); HRMS (ESI<sup>+</sup>) found 620.3539; C<sub>40</sub>H<sub>50</sub>NO<sub>3</sub>Si ([M+H]<sup>+</sup>) requires 620.3560. Further elution gave **28** as a colourless oil (10 mg, 7%, >98% de);  $\nu_{\max}$  (film) 1725 (C=O);  $\delta_{\text{H}}$  (400 MHz, CDCl<sub>3</sub>) 1.07 (9H, s, SiCMe<sub>3</sub>), 1.44 (9H, s, OCMe<sub>3</sub>), 1.35-1.39 (1H, m, C(4)H<sub>A</sub>), 1.56-1.67 (2H, m, C(4)H<sub>B</sub>, C(5)H<sub>A</sub>), 1.81-1.88 (1H, m, C(5)H<sub>B</sub>), 2.69 (1H, app q,  $J$  7.8, C(1)H), 3.56 (2H, d,  $J$  14.0, N(CH<sub>A</sub>CH<sub>B</sub>Ph)<sub>2</sub>), 3.67 (2H, d,  $J$  14.0, N(CH<sub>A</sub>CH<sub>B</sub>Ph)<sub>2</sub>), 3.73 (1H, dd,  $J$  5.7, 1.9, C(2)H), 4.34-4.38 (1H, m, C(3)H), 7.18-7.76 (20H, m, Ph);  $\delta_{\text{C}}$  (100 MHz, CDCl<sub>3</sub>) 19.0, 26.3, 26.9, 27.9, 33.3, 44.2, 54.8, 72.3, 76.4, 79.9, 126.5, 127.3, 127.4, 127.9, 128.4, 128.6, 129.4, 129.5, 133.8, 134.6, 135.9, 139.8, 175.1;  $m/z$  (ESI<sup>+</sup>) 620 ([M+H]<sup>+</sup>, 100%); HRMS (ESI<sup>+</sup>) found 620.3558; C<sub>25</sub>H<sub>34</sub>NO<sub>3</sub>Si ([M+H]<sup>+</sup>) requires 620.3560.

**Methyl (1*RS*,2*RS*,3*RS*, $\alpha$ *SR*)-2-[*N*-benzyl-*N*-( $\alpha$ -methylbenzyl)amino]-3-methoxy-cyclopentane-carboxylate **29****

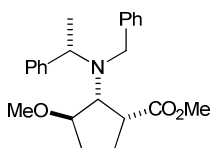

Following *General Procedure 1a*, BuLi (2.5 M in hexanes, 1.56 mL, 3.91 mmol), (*RS*)-*N*-benzyl-*N*-( $\alpha$ -methylbenzyl)amine (835 mg, 3.95 mmol) in THF (1 mL) and **18** (123 mg, 0.79 mmol) in THF (2 mL)

gave **29** in >98% de. Purification by chromatography (1% Et<sub>2</sub>O in pentane) gave **29** as a white crystalline solid (87 mg, 30%, >98% de); mp 70-71 °C;  $\nu_{\max}$  (KBr) 1725 (C=O);  $\delta_{\text{H}}$  (400 MHz, CDCl<sub>3</sub>) 1.35 (3H, d, *J* 6.6, C( $\alpha$ )Me), 1.46-1.56 (1H, m, C(4)H<sub>A</sub>), 1.74-1.91 (2H, m, C(5)H<sub>2</sub>), 2.20-2.29 (1H, m, C(4)H<sub>B</sub>), 2.87 (1H, dt, *J* 4.3, 3.8, C(1)H), 3.24 (3H, s, C(3)OMe), 3.32 (1H, app t, *J* 7.7, C(2)H), 3.67 (3H, s, CO<sub>2</sub>Me), 3.94 (2H, app s, CH<sub>2</sub>Ph), 4.02-4.07 (1H, m, C(3)H), 4.09 (1H, q, *J* 6.6, C( $\alpha$ )H), 7.22-7.45 (10H, m, Ph);  $\delta_{\text{C}}$  (100 MHz, CDCl<sub>3</sub>) 15.1, 24.7, 28.5, 46.9, 51.3, 51.4, 57.0, 67.7, 82.0, 126.4, 126.6, 127.9, 128.1, 128.1, 141.9, 141.4, 175.6; *m/z* (ESI<sup>+</sup>) 368 ([M+H]<sup>+</sup>, 100%); HRMS (ESI<sup>+</sup>) found 368.2228; C<sub>23</sub>H<sub>29</sub>NO<sub>3</sub> ([M+H]<sup>+</sup>) requires 368.2226.

### X-ray Crystal Structure Determination for **29**

Data were collected using an Enraf-Nonius  $\kappa$ -CCD diffractometer with graphite monochromated Mo-*K* $\alpha$  radiation using standard procedures at 190 K. The structure was solved by direct methods (SIR92); all non-hydrogen atoms were refined with anisotropic thermal parameters. Hydrogen atoms were added at idealised positions. The structure was refined using CRYSTALS.<sup>3</sup>

X-ray crystal structure data for **29** [C<sub>23</sub>H<sub>29</sub>NO<sub>3</sub>]: *M* = 734.98, orthorhombic, space group *P b n 2*<sub>1</sub>, *a* = 13.9137(2) Å, *b* = 16.8715(3) Å, *c* = 17.2156(3) Å, *V* = 4041.28(11) Å<sup>3</sup>, *Z* = 8,  $\mu$  = 0.079 mm<sup>-1</sup>, colourless block, crystal dimensions = 0.2 × 0.2 × 0.2 mm<sup>3</sup>. A total of 4740 unique reflections were measured for 5 <  $\theta$  < 27 and 4060 reflections were used in the refinement. The final parameters were *wR*<sub>2</sub> = 0.051 and *R*<sub>1</sub> = 0.042 [*I* > 1.5 $\sigma$ (*I*)]. Crystallographic data (excluding structure factors) has been deposited with the Cambridge Crystallographic Data Centre as supplementary publication number CCDC 669234. Copies of the data can be obtained, free of charge, on application to CCDC, 12 Union Road, Cambridge CB2 1EZ, UK [fax: +44(0)-1223-336033 or e-mail: deposit@ccdc.cam.ac.uk].

### Methyl (1*RS*,2*RS*,3*RS*, $\alpha$ *SR*)- and (1*RS*,2*SR*,3*SR*, $\alpha$ *RS*)-2-[*N*-benzyl-*N*-( $\alpha$ -methylbenzyl)amino]-3-*tert*-butyldiphenylsilyloxy-cyclopentane-carboxylate (1*RS*,2*RS*,3*RS*, $\alpha$ *SR*)-**31** and (1*RS*,2*SR*,3*SR*, $\alpha$ *RS*)-**32**

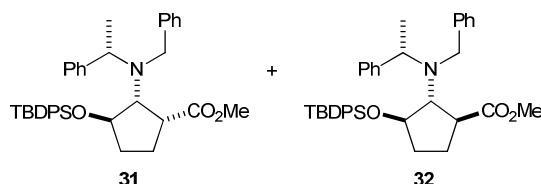

<sup>3</sup> P. W. Betteridge, J. R. Carruthers, R. I. Cooper, C. K. Prout and D. J. Watkin, CRYSTALS, 2001, Issue 11, Chemical Crystallography Laboratory, University of Oxford, UK.

Following *General Procedure 1a*, BuLi (2.5 M in hexanes, 1.04 mL, 2.60 mmol), (*RS*)-*N*-benzyl-*N*-( $\alpha$ -methylbenzyl)amine (555 mg, 2.63 mmol) in THF (1 mL) and **20** (200 mg, 0.53 mmol) in THF (1 mL) gave a 92:8 mixture of **31:32**. Purification by chromatography (1.5% Et<sub>2</sub>O in pentane) gave **31** as a pale yellow crystalline solid (87 mg, 28%, >98% de); mp 72-73 °C;  $\nu_{\max}$  (KBr) 1728 (C=O);  $\delta_{\text{H}}$  (400 MHz, CDCl<sub>3</sub>) 1.08 (9H, s, CMe<sub>3</sub>), 1.21-1.35 (4H, m, C(4)H<sub>A</sub>, C( $\alpha$ )Me), 1.45-1.52 (1H, m, C(4)H<sub>B</sub>), 1.67-1.82 (2H, m, C(5)H<sub>2</sub>), 2.80-2.86 (1H, m, C(1)H), 3.47-3.52 (1H, m, C(2)H), 3.59 (1H, s, OMe), 3.83 (1H, d, *J* 14.0, NCH<sub>A</sub>), 3.91 (1H, q, *J* 6.8, C( $\alpha$ )H), 3.96 (1H, d, *J* 14.0, NCH<sub>B</sub>), 4.64 (1H, app q, *J* 5.5, C(3)H), 7.24-7.44 (16H, m, Ph), 7.66-7.68 (2H, m, Ph), 7.72-7.73 (2H, m, Ph);  $\delta_{\text{C}}$  (100 MHz, CDCl<sub>3</sub>) 14.4, 19.2, 24.9, 27.0, 32.6, 46.3, 51.4, 51.8, 56.2, 68.8, 95.7, 126.5, 126.6, 127.5, 127.6, 127.7, 128.2, 128.5, 129.5, 129.7, 135.9, 133.9, 134.7, 141.2, 143.9, 175.4; *m/z* (ESI<sup>+</sup>) 592 ([M+H]<sup>+</sup>, 100%); HRMS (ESI<sup>+</sup>) found 592.3264; C<sub>38</sub>H<sub>46</sub>NO<sub>3</sub>Si ([M+H]<sup>+</sup>) requires 592.3247. Further elution gave **32** as a colourless oil (6.2 mg, 2%, >98% de);  $\nu_{\max}$  (KBr) 1732 (C=O);  $\delta_{\text{H}}$  (400 MHz, CDCl<sub>3</sub>) 1.10 (9H, s, CMe<sub>3</sub>), 1.30-1.33 (1H, m, C(4)H<sub>A</sub>), 1.34 (3H, d, *J* 6.9, C( $\alpha$ )Me), 1.51-1.64 (2H, m, C(5)H<sub>2</sub>), 1.73-1.81 (1H, m, C(4)H<sub>B</sub>), 2.54-2.62 (1H, m, C(1)H), 3.55 (3H, s, OMe), 3.67 (2H, dd, *J* 14.9, 9.2, NCH<sub>2</sub>), 3.78 (1H, dd, *J* 5.4, 1.3, C(2)H), 3.90 (1H, q, *J* 6.9, C( $\alpha$ )H), 4.27 (1H, q, *J* 5.6, C(3)H), 7.16-7.76 (20H, m, Ph);  $\delta_{\text{C}}$  (100 MHz, CDCl<sub>3</sub>) 15.1, 19.1, 26.3, 26.9, 33.1, 45.0, 51.0, 51.4, 58.3, 71.2, 77.6, 126.4, 127.3, 127.4, 127.8, 127.9, 128.0, 129.3, 129.5, 133.8, 134.5, 135.8, 135.9, 141.5, 144.2, 176.1; *m/z* (ESI<sup>+</sup>) 592 ([M+H]<sup>+</sup>, 100%); HRMS (ESI<sup>+</sup>) found 592.3254; C<sub>38</sub>H<sub>46</sub>NO<sub>3</sub>Si ([M+H]<sup>+</sup>) requires 592.3247.

### X-ray Crystal Structure Determination for **31**

Data were collected using an Enraf-Nonius  $\kappa$ -CCD diffractometer with graphite monochromated Mo-*K* $\alpha$  radiation using standard procedures at 190 K. The structure was solved by direct methods (SIR92); all non-hydrogen atoms were refined with anisotropic thermal parameters. Hydrogen atoms were added at idealised positions. The structure was refined using CRYSTALS.<sup>4</sup>

X-ray crystal structure data for **31** [C<sub>38</sub>H<sub>45</sub>NO<sub>3</sub>Si]: *M* = 591.87, monoclinic, space group *C* 1 2/*c* 1, *a* = 26.4012(4) Å, *b* = 10.3877(1) Å, *c* = 24.6887(4) Å,  $\beta$  = 96.3914(6)°, *V* = 6728.74(16) Å<sup>3</sup>, *Z* = 8,  $\mu$  = 0.106 mm<sup>-1</sup>, colourless block, crystal dimensions = 0.1 × 0.1 × 0.1 mm<sup>3</sup>. A total of 7581 unique reflections were measured for 5 <  $\theta$  < 27 and 5208 reflections were used in the refinement. The final parameters were *wR*<sub>2</sub> = 0.053 and *R*<sub>1</sub> = 0.044 [*I* > 3 $\sigma$ (*I*)]. Crystallographic data (excluding structure factors) has been deposited with

<sup>4</sup> P. W. Betteridge, J. R. Carruthers, R. I. Cooper, C. K. Prout and D. J. Watkin, CRYSTALS, 2001, Issue 11, Chemical Crystallography Laboratory, University of Oxford, UK.

the Cambridge Crystallographic Data Centre as supplementary publication number CCDC 669235. Copies of the data can be obtained, free of charge, on application to CCDC, 12 Union Road, Cambridge CB2 1EZ, UK [fax: +44(0)-1223-336033 or e-mail: deposit@ccdc.cam.ac.uk].

***tert*-Butyl (1*RS*,2*RS*,3*RS*, $\alpha$ *SR*)-2-[*N*-benzyl-*N*-( $\alpha$ -methylbenzyl)amino]-3-methoxy-cyclopentane-carboxylate **33****

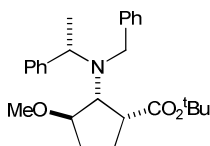

Following *General Procedure 1a*, BuLi (1.6 M in hexanes, 1.56 mL, 2.50 mmol), (*RS*)-*N*-benzyl-*N*-( $\alpha$ -methylbenzyl)amine (533 mg, 2.52 mmol) in THF (6 mL) and **19** (100 mg, 0.51 mmol) in THF (1 mL) gave **33** in >98% de. Purification by chromatography (2% Et<sub>2</sub>O in pentane) gave **33** as a colourless oil (179 mg, 86%, >98% de);  $\nu_{\max}$  (film) 1722 (C=O);  $\delta_{\text{H}}$  (400 MHz, CDCl<sub>3</sub>) 1.37 (3H, d, *J* 6.9, C( $\alpha$ )Me), 1.52 (9H, s, CMe<sub>3</sub>), 1.72-1.80 (2H, m, C(5)H<sub>2</sub>), 2.18-2.29 (2H, m, C(4)H<sub>2</sub>), 2.78-2.83 (1H, m, C(1)H), 3.10 (3H, s, OMe), 3.19 (1H, app t, *J* 7.6, C(2)H), 3.95-4.00 (1H, m, C(3)H), 3.99 (2H, app d, *J* 15.7, NCH<sub>2</sub>), 4.24 (1H, q, *J* 6.9, C( $\alpha$ )H), 7.21-7.49 (10H, m, Ph);  $\delta_{\text{C}}$  (100 MHz, CDCl<sub>3</sub>) 17.3, 25.0, 28.2, 28.3, 48.4, 50.9, 56.6, 57.9, 68.8, 79.9, 82.2, 126.1, 26.7, 127.9, 128.0, 128.6, 128.7, 129.7, 142.8, 143.1, 174.9; *m/z* (ESI<sup>+</sup>) 410 ([M+H]<sup>+</sup>, 100%); HRMS (ESI<sup>+</sup>) found 410.2704; C<sub>26</sub>H<sub>36</sub>NO<sub>3</sub> ([M+H]<sup>+</sup>) requires 410.2695.

***tert*-Butyl (1*RS*,2*SR*,3*SR*, $\alpha$ *RS*)-2-[*N*-benzyl-*N*-( $\alpha$ -methylbenzyl)amino]-3-methoxy-cyclopentane-carboxylate **34** and (1*RS*,2*SR*,3*SR*, $\alpha$ *RS*)-2-[*N*-benzyl-*N*-( $\alpha$ -methylbenzyl)amino]-3-methoxy-cyclopentane-carboxylic acid **37****

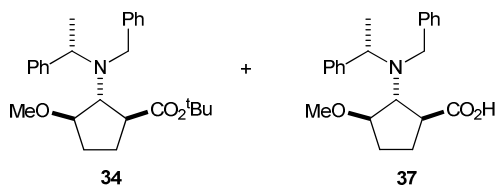

Following *General Procedure 2*, **33** (89 mg, 0.22 mmol) and KO<sup>t</sup>Bu (3.1 mg, 0.04 mmol) in <sup>t</sup>BuOH/THF (1:1, 6 mL) gave **34** as a colourless oil (63 mg, 71%, >98% de);  $\nu_{\max}$  (film) 1725 (C=O);  $\delta_{\text{H}}$  (400 MHz, PhMe-*d*<sub>8</sub>) 1.28-1.40 (1H, m, C(4)H<sub>A</sub>), 1.39 (9H, s, CMe<sub>3</sub>), 1.41 (3H, d, *J* 6.8, C( $\alpha$ )Me), 1.49-1.58 (1H, m, C(5)H<sub>A</sub>), 1.58-1.67 (1H, m, C(4)H<sub>B</sub>), 1.79-1.88 (1H, m, C(5)H<sub>B</sub>), 2.52-2.59 (1H, m, C(1)H), 3.14 (3H, s, OMe), 3.49-3.53 (1H, m, C(3)H), 3.61 (1H, d, *J* 14.5, NCH<sub>A</sub>), 3.67 (1H, d, *J* 14.5, NCH<sub>B</sub>), 3.83-3.87 (1H, m, C(2)H), 4.00 (1H, q, *J* 6.8, C( $\alpha$ )H), 7.00-7.50 (10H, m, Ph);  $\delta_{\text{C}}$  (125 MHz, PhMe-*d*<sub>8</sub>) 21.2, 31.6, 32.8, 34.2,

52.8, 55.9, 61.3, 63.6, 74.3, 83.9, 88.4, 132.4, 132.5, 132.6, 132.7, 132.9, 133.0, 133.1, 133.3, 133.5, 142.0, 142.1, 178.7;  $m/z$  (ESI<sup>+</sup>) 410 ([M+H]<sup>+</sup>, 100%); HRMS (ESI<sup>+</sup>) found 410.2694; C<sub>26</sub>H<sub>36</sub>NO<sub>3</sub> ([M+H]<sup>+</sup>) requires 410.2695. Further elution gave **37** as a colourless oil (23 mg, 29%, >98% de);  $\nu_{\max}$  (film) 1701 (C=O);  $\delta_{\text{H}}$  (400 MHz, CDCl<sub>3</sub>) 1.54 (3H, d,  $J$  6.8, C( $\alpha$ )Me), 1.75-1.81 (2H, m, C(4) $H_{\text{A}}$ , C(5) $H_{\text{A}}$ ), 1.80-1.92 (2H, m, C(4) $H_{\text{B}}$ , C(5) $H_{\text{B}}$ ), 2.56-2.64 (1H, m, C(1) $H$ ), 3.39 (3H, s, OMe), 3.40-3.45 (1H, m, C(2) $H$ ), 3.85-3.94 (3H, m, C(3) $H$ , NCH<sub>2</sub>), 4.10 (1H, q,  $J$  6.8, C( $\alpha$ ) $H$ ), 7.20-7.38 (10H, m, Ph);  $\delta_{\text{C}}$  (100 MHz, CDCl<sub>3</sub>) 14.3, 27.8, 44.4, 50.6, 56.9, 57.9, 66.5, 79.9, 80.0, 127.6, 128.3, 128.4, 128.6, 128.9, 129.0, 174.4;  $m/z$  (ESI<sup>+</sup>) 354 ([M+H]<sup>+</sup>, 100%); HRMS (ESI<sup>+</sup>) found 354.2064; C<sub>22</sub>H<sub>28</sub>NO<sub>3</sub> ([M+H]<sup>+</sup>) requires 354.2069.

***tert*-Butyl (1*RS*,2*RS*,3*RS*, $\alpha$ *SR*)- and (1*RS*,2*SR*,3*SR*, $\alpha$ *RS*)-2-[*N*-benzyl-*N*-( $\alpha$ -methylbenzyl)amino]-3-*tert*-butyldiphenylsilyloxy-cyclopentane-carboxylate (1*RS*,2*RS*,3*RS*, $\alpha$ *SR*)-**35** and (1*RS*,2*SR*,3*SR*, $\alpha$ *RS*)-**36****

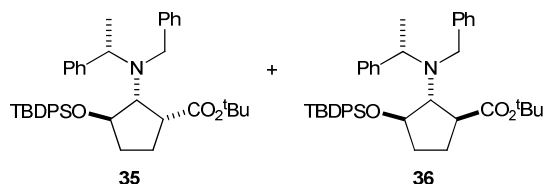

Following *General Procedure 1a*, BuLi (2.5 M in hexanes, 0.42 mL, 1.05 mmol), (*RS*)-*N*-benzyl-*N*-( $\alpha$ -methylbenzyl)amine, (225 mg, 1.07 mmol) in THF (2 mL) and **21** (90 mg, 0.21 mmol) in THF (1.5 mL) gave a 90:10 mixture of **35**:**36**. Purification by chromatography (1% Et<sub>2</sub>O in pentane) gave **35** as a colourless oil (118 mg, 88%, >98% de);  $\nu_{\max}$  (film) 1722 (C=O);  $\delta_{\text{H}}$  (400 MHz, CDCl<sub>3</sub>) 1.09 (9H, s, SiCMe<sub>3</sub>), 1.33-1.34 (1H, m, C(4) $H_{\text{A}}$ ), 1.35 (3H, d,  $J$  6.6, C( $\alpha$ )Me), 1.41 (9H, s, OCMe<sub>3</sub>), 1.52-1.28 (3H, m, C(4) $H_{\text{B}}$ , C(5) $H_2$ ), 2.48-2.49 (1H, m, C(1) $H$ ), 3.41 (1H, app t,  $J$  7.7, C(2) $H$ ), 4.04-4.07 (3H, m, C( $\alpha$ ) $H$ , NCH<sub>2</sub>), 4.65-4.70 (1H, m, C(3) $H$ ), 7.24-7.72 (20H, m, Ph);  $\delta_{\text{C}}$  (100 MHz, CDCl<sub>3</sub>) 16.5, 19.2, 25.0, 27.0, 28.1, 31.5, 47.3, 51.6, 57.2, 69.6, 76.0, 80.0, 126.4, 126.6, 127.4, 125.6, 128.0, 128.2, 128.3, 129.4, 129.5, 134.0, 134.9, 135.8, 135.9, 142.0, 144.1, 174.8;  $m/z$  (ESI<sup>+</sup>) 634 ([M+H]<sup>+</sup>, 100%); HRMS (ESI<sup>+</sup>) found 634.3759; C<sub>41</sub>H<sub>52</sub>NO<sub>3</sub>Si ([M+H]<sup>+</sup>) requires 634.3787. Further elution gave **36** as a colourless oil (13 mg, 10%, >98% de);  $\nu_{\max}$  (film) 1724 (C=O);  $\delta_{\text{H}}$  (400 MHz, CDCl<sub>3</sub>) 1.10 (9H, s, SiCMe<sub>3</sub>), 1.35 (3H, d,  $J$  6.8, C( $\alpha$ )Me), 1.41 (9H, s, OCMe<sub>3</sub>), 1.24-1.47 (1H, m, C(4) $H_{\text{A}}$ ), 1.48-1.63 (2H, m, C(4) $H_{\text{B}}$ , C(5) $H_{\text{A}}$ ), 1.69-1.78 (1H, m, C(5) $H_{\text{B}}$ ), 2.45-2.55 (1H, m, C(1) $H$ ), 3.64 (1H, AB system,  $J_{\text{AB}}$  15.4, NCH<sub>2</sub>), 3.85 (1H, dd,  $J$  1.4, 5.5, C(2) $H$ ), 3.93 (1H, q,  $J$  6.8, C( $\alpha$ ) $H$ ), 4.26 (1H, app dd,  $J$  5.8, 5.5, C(3) $H$ ), 7.12-7.79 (20H, m, Ph);  $\delta_{\text{C}}$  (100 MHz, CDCl<sub>3</sub>) 18.7, 19.1, 26.7, 26.9, 27.9, 33.1, 46.2, 51.0, 59.1, 71.1, 77.7, 79.7, 126.2, 126.4, 127.3, 127.4,

127.8, 127.9, 128.1, 129.3, 129.5, 133.8, 134.6, 135.7, 135.8, 135.9, 141.8 144.7, 175.0;  $m/z$  (ESI<sup>+</sup>) 634 ([M+H]<sup>+</sup>, 100%); HRMS (ESI<sup>+</sup>) found 634.3709; C<sub>41</sub>H<sub>52</sub>NO<sub>3</sub>Si ([M+H]<sup>+</sup>) requires 634.3716.

***tert*-Butyl (1*RS*,2*SR*,3*SR*, $\alpha$ *RS*)-2-[*N*-benzyl-*N*-( $\alpha$ -methylbenzyl)amino]-3-*tert*-butyldiphenylsilyloxy-cyclopentane-carboxylate **36****

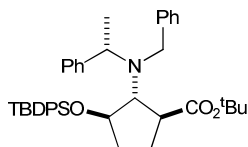

Following *General Procedure 2*, **35** (81 mg, 0.13 mmol) and KO<sup>t</sup>Bu (2.3 mg, 0.03 mmol) in <sup>t</sup>BuOH/THF (1:1, 6 mL) gave **36** as a colourless oil (81 mg, quant, >98% de).

***tert*-Butyl (1*RS*,2*RS*,3*RS*, $\alpha$ *SR*)-2-[*N*-3,4-dimethoxybenzyl-*N*-( $\alpha$ -methylbenzyl)amino]-3-methoxy-cyclopentane-carboxylate **39****

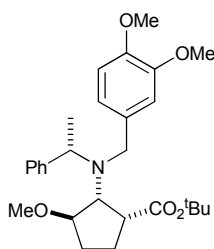

Following *General Procedure 1a*, BuLi (2.5 M in hexanes, 1 mL, 2.5 mmol), (*RS*)-*N*-3,4-dimethoxybenzyl-*N*-( $\alpha$ -methylbenzyl)amine (684 mg, 2.52 mmol) in THF (70 mL) and **19** (100 mg, 0.5 mmol) in THF (4.2 mL) gave **39** in >98% de. Purification by chromatography (15% Et<sub>2</sub>O in pentane) gave **39** as a pale yellow oil (208 mg, 89%, >98% de);  $\nu_{\max}$  (film) 1721 (C=O);  $\delta_{\text{H}}$  (400 MHz, CDCl<sub>3</sub>) 1.37 (3H, d,  $J$  6.8, C( $\alpha$ )Me), 1.48 (9H, s, CMe<sub>3</sub>), 1.67-1.77 (2H, m, C(5)H<sub>2</sub>), 2.17-2.26 (2H, m, C(4)H<sub>2</sub>), 2.74-2.78 (1H, m, C(1)H), 3.14 (3H, s, C(3)OMe), 3.16-3.20 (1H, m, C(2)H), 3.83-3.98 (2H, m, NCH<sub>2</sub>), 3.87 (3H, s, ArOMe), 3.91 (3H, s, ArOMe), 4.01-4.06 (1H, m, C(3)H), 4.21 (1H, q,  $J$  6.8, C( $\alpha$ )H), 6.80-7.42 (8H, m, Ar, Ph);  $\delta_{\text{C}}$  (100 MHz, CDCl<sub>3</sub>) 16.7, 24.9, 28.0, 28.1, 48.2, 50.7, 55.7, 55.8, 57.6, 68.7, 79.9, 82.0, 110.6, 111.3, 119.5, 126.5, 127.9, 135.2, 143.4, 147.3, 148.6, 174.6;  $m/z$  (ESI<sup>+</sup>) 470 ([M+H]<sup>+</sup>, 100%); HRMS (ESI<sup>+</sup>) found 470.2903; C<sub>43</sub>H<sub>56</sub>NO<sub>5</sub>Si ([M+H]<sup>+</sup>) requires 470.2906.

**Methyl (1*RS*,2*SR*,3*SR*, $\alpha$ *RS*)-2-[*N*-3,4-dimethoxybenzyl-*N*-( $\alpha$ -methylbenzyl)amino]-3-methoxy-cyclopentane-carboxylate **40****

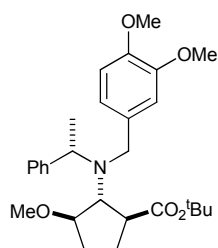

Following *General Procedure 2*, **39** (60 mg, 0.13 mmol) and KO<sup>t</sup>Bu (2.3 mg, 0.03 mmol) in <sup>t</sup>BuOH/THF (1:1, 6 mL) gave **40** as a pale yellow oil (60 mg, quant, >98% de);  $\nu_{\max}$  (film) 1722 (C=O);  $\delta_{\text{H}}$  (400 MHz, PhMe-*d*<sub>8</sub>) 1.34 (3H, d, *J* 6.8, C( $\alpha$ )Me), 1.44 (9H, s, CMe<sub>3</sub>), 1.45-1.49 (1H, m, C(4)*H*<sub>A</sub>), 1.55-1.62 (1H, m, C(5)*H*<sub>A</sub>), 1.62-1.68 (1H, m, C(4)*H*<sub>B</sub>), 1.82-1.87 (1H, m, C(5)*H*<sub>B</sub>), 2.57-2.63 (1H, m, C(1)*H*), 3.15 (3H, s, C(3)OMe), 3.52-3.56 (1H, m, C(3)*H*), 3.52 (3H, s, ArOMe), 3.63 (2H, dd, *J* 14.7, 8.5, NCH<sub>2</sub>), 3.75 (3H, s, ArOMe), 3.85-3.88 (1H, m, C(2)*H*), 4.04 (1H, q, *J* 6.8, C( $\alpha$ )*H*), 6.68-7.50 (8H, m, *Ar*, *Ph*);  $\delta_{\text{C}}$  (125 MHz, PhMe-*d*<sub>8</sub>) 16.1, 27.0, 28.1, 29.5, 48.5, 50.8, 55.6, 55.7, 56.7, 58.6, 69.5, 79.3, 83.9, 112.0, 112.2, 113.1, 127.8, 127.9, 134.8, 137.2, 137.5, 145.0, 149.3, 150.5, 174.0; *m/z* (ESI<sup>+</sup>) 470 ([M+H]<sup>+</sup>, 100%); HRMS (ESI<sup>+</sup>) found 470.2903; C<sub>43</sub>H<sub>56</sub>NO<sub>5</sub>Si ([M+H]<sup>+</sup>) requires 470.2906.

***tert*-Butyl (1*RS*,2*RS*,3*RS*, $\alpha$ *SR*)-2-[*N*-3,4-dimethoxybenzyl-*N*-( $\alpha$ -methylbenzyl)amino]-3-*tert*-butyldiphenylsilyloxy-cyclopentane-carboxylate **41****

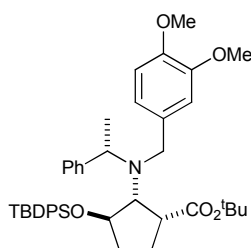

Following *General Procedure 1a*, BuLi (2.5 M in hexanes, 0.47 mL, 1.17 mmol), (*RS*)-*N*-3,4-dimethoxybenzyl-*N*-( $\alpha$ -methylbenzyl)amine (321 mg, 1.18 mmol) in THF (33 mL) and **21** (100 mg, 0.24 mmol) in THF (2 mL) gave a 94:6 mixture of **41**:**42**. Purification by chromatography (20% Et<sub>2</sub>O in pentane) gave **41** as a yellow oil (130 mg, 79%, >98% de);  $\nu_{\max}$  (film) 1721 (C=O);  $\delta_{\text{H}}$  (400 MHz, CDCl<sub>3</sub>) 1.07 (9H, s, SiCMe<sub>3</sub>), 1.21-1.47 (13H, m, C(4)*H*<sub>A</sub>, C( $\alpha$ )Me, OCMe<sub>3</sub>), 1.52-1.60 (2H, m, C(5)*H*<sub>2</sub>), 1.61-1.68 (2H, m, C(4)*H*<sub>B</sub>), 2.46-2.49 (1H, m, C(1)*H*), 3.38-3.41 (1H, m, C(2)*H*), 3.86 (3H, s, ArOMe), 3.88 (3H, s, ArOMe), 3.95 (2H, AB system, *J*<sub>AB</sub> 14.3, NCH<sub>2</sub>), 4.05 (1H, q, *J* 6.7, C( $\alpha$ )*H*), 4.66-4.70 (1H, m, C(3)*H*), 6.76-7.71 (18H, m, *Ar*, *Ph*);  $\delta_{\text{C}}$  (100 MHz, CDCl<sub>3</sub>) 15.5, 19.1, 24.8, 26.9, 28.0, 31.5, 47.7, 51.1, 55.5, 55.6, 56.4, 69.3,

75.9, 79.7, 110.6, 111.4, 119.9, 126.4, 129.4, 133.9, 135.8, 143.9, 147.5, 148.7, 174.9;  $m/z$  ( $\text{ESI}^+$ ) 694 ( $[\text{M}+\text{H}]^+$ , 100%); HRMS ( $\text{ESI}^+$ ) found 694.3920;  $\text{C}_{43}\text{H}_{56}\text{NO}_5\text{Si}$  ( $[\text{M}+\text{H}]^+$ ) requires 694.3928.

***tert*-Butyl (1*RS*,2*SR*,3*SR*, $\alpha$ *RS*)-2-[*N*-3,4-dimethoxybenzyl-*N*-( $\alpha$ -methylbenzyl)amino]-3-*tert*-butyldiphenylsilyloxy-cyclopentane-carboxylate **42****

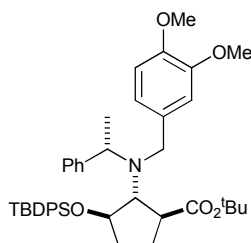

Following *General Procedure 2*, **41** (50 mg, 0.07 mmol) and  $\text{KO}^t\text{Bu}$  (1.2 mg, 0.01 mmol) in  $^t\text{BuOH/THF}$  (1:1, 6 mL) gave **42** as a viscous yellow oil (49 mg, 98%, >98% de);  $\nu_{\text{max}}$  (film) 1721 (C=O);  $\delta_{\text{H}}$  (400 MHz,  $\text{PhMe-}d_8$ ) 1.23-1.24 (1H, m, C(4) $H_A$ ), 1.24 (9H, s,  $\text{SiCMe}_3$ ), 1.29-1.37 (1H, m, C(5) $H_A$ ), 1.40 (9H, s,  $\text{OCMe}_3$ ), 1.46 (3H, d,  $J$  6.8, C( $\alpha$ ) $Me$ ), 1.72-1.77 (1H, m, C(4) $H_B$ ), 1.87-1.92 (1H, m, C(5) $H_B$ ), 2.57-2.65 (1H, m, C(1) $H$ ), 3.46-3.53 (2H, m,  $\text{NCH}_2$ ), 3.50 (3H, s,  $\text{ArOMe}$ ), 3.63 (3H, s,  $\text{ArOMe}$ ), 4.03 (1H, q,  $J$  6.8, C( $\alpha$ ) $H$ ), 4.12-4.16 (1H, m, C(2) $H$ ), 4.36-4.44 (1H, m, C(3) $H$ ), 6.42-7.90 (18H, m,  $Ar, Ph$ );  $\delta_{\text{C}}$  (100 MHz,  $\text{PhMe-}d_8$ ) 20.7, 21.0, 21.3, 26.7, 27.2, 28.1, 47.0, 50.9, 55.5, 55.6, 58.9, 71.7, 78.6, 79.3, 112.1, 112.7, 120.5, 124.7, 137.4, 145.3, 149.0, 150.2, 174.6;  $m/z$  ( $\text{ESI}^+$ ) 694 ( $[\text{M}+\text{H}]^+$ , 100%); HRMS ( $\text{ESI}^+$ ) found 694.3914;  $\text{C}_{43}\text{H}_{56}\text{NO}_5\text{Si}$  ( $[\text{M}+\text{H}]^+$ ) requires 694.3928.

**Parallel kinetic resolution of **19**: *tert*-butyl (1*R*,2*R*,3*R*, $\alpha$ *S*)-2-[*N*-benzyl-*N*-( $\alpha$ -methylbenzyl)amino]-3-methoxy-cyclopentane-carboxylate **33** and *tert*-butyl (1*S*,2*S*,3*S*, $\alpha$ *R*)-2-[*N*-3,4-dimethoxybenzyl-*N*-( $\alpha$ -methylbenzyl)amino]-3-methoxy-cyclopentane-carboxylate **39****

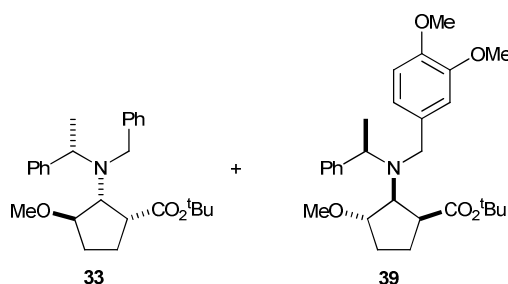

Following *General Procedure 1b*,  $\text{BuLi}$  (750  $\mu\text{L}$ , 1.87 mmol), (*S*)-*N*-benzyl-*N*-( $\alpha$ -methylbenzyl)amine (200 mg, 0.95 mmol), (*R*)-*N*-3,4-dimethoxybenzyl-*N*-( $\alpha$ -methylbenzyl)amine (257 mg, 0.95 mmol) in THF (52 mL) and **19** (75 mg, 0.38 mmol) in THF (3.2 mL) gave a 50:50 mixture of **33**:**39**. Purification by chromatography (3%  $\text{Et}_2\text{O}$  in pentane) gave (1*R*,2*R*,3*R*, $\alpha$ *S*)-**33** as a colourless oil (39 mg, 25%, >98% de);



$[\alpha]_{\text{D}}^{24} -91.1$  ( $c$  1.0 in  $\text{CHCl}_3$ ). Further elution gave (1*S*,2*S*,3*S*, $\alpha$ *R*)-**39** as a pale yellow oil (53 mg, 30%, >98% de);  $[\alpha]_{\text{D}}^{24} +67.4$  ( $c$  1.2 in  $\text{CHCl}_3$ ).

***tert*-Butyl (1*S*,2*R*,3*R*, $\alpha$ *S*)-[*N*-benzyl-*N*-( $\alpha$ -methylbenzyl)amino]-3-methoxy-cyclopentane-carboxylate **34** and (1*S*,2*R*,3*R*, $\alpha$ *S*)-2-[*N*-benzyl-*N*-( $\alpha$ -methylbenzyl)amino]-3-methoxy-cyclopentane-carboxylic acid **37****

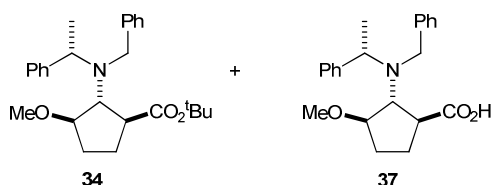

Following *General Procedure 2*, (1*R*,2*R*,3*R*, $\alpha$ *S*)-**33** (190 mg, 0.46 mmol) and  $\text{KO}^t\text{Bu}$  (7.1 mg, 0.09 mmol) in  $^t\text{BuOH/THF}$  (1:1, 10 mL) gave (1*S*,2*R*,3*R*, $\alpha$ *S*)-**34** as a colourless oil (160 mg, 85%, >98% de);  $[\alpha]_{\text{D}}^{24} +46.7$  ( $c$  0.7 in  $\text{CHCl}_3$ ). Further elution gave (1*S*,2*R*,3*R*, $\alpha$ *S*)-**37** as a colourless oil (24 mg, 15%, >98% de);  $[\alpha]_{\text{D}}^{24} +12.6$  ( $c$  1.0 in  $\text{CHCl}_3$ ).

***tert*-Butyl (1*R*,2*S*,3*S*, $\alpha$ *R*)-2-[*N*-3,4-dimethoxybenzyl-*N*-( $\alpha$ -methylbenzyl)amino]-3-methoxy-cyclopentane-carboxylate **40****

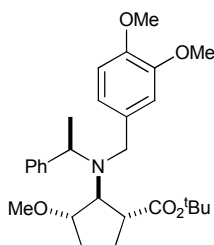

Following *General Procedure 2*, (1*S*,2*S*,3*S*, $\alpha$ *R*)-**39** (348 mg, 0.74 mmol) and  $\text{KO}^t\text{Bu}$  (12 mg, 0.15 mmol) in  $^t\text{BuOH/THF}$  (1:1, 18 mL) gave (1*R*,2*S*,3*S*, $\alpha$ *R*)-**40** (210 mg, 61%, >98% de) as a pale yellow oil;  $[\alpha]_{\text{D}}^{24} -36.0$  ( $c$  1.0 in  $\text{CHCl}_3$ ).

**Parallel kinetic resolution of **21**: *tert*-butyl (1*R*,2*R*,3*R*, $\alpha$ *S*)-2-[*N*-benzyl-*N*-( $\alpha$ -methylbenzyl)amino]-3-*tert*-butyldiphenylsilyloxy-cyclopentane-carboxylate **35** and *tert*-butyl (1*S*,2*S*,3*S*, $\alpha$ *R*)-2-[*N*-3,4-dimethoxybenzyl-*N*-( $\alpha$ -methylbenzyl)amino]-3-*tert*-butyldiphenylsilyloxy-cyclopentane-carboxylate **41****

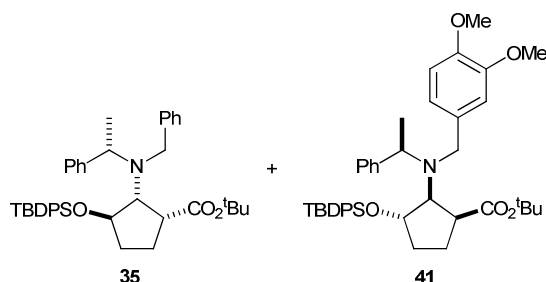

Following *General Procedure 1b*, BuLi (2.5 M in hexanes, 469  $\mu$ L, 1.17 mmol), (*S*)-*N*-benzyl-*N*-( $\alpha$ -methylbenzyl)amine (125 mg, 0.59 mmol), (*R*)-*N*-3,4-dimethoxybenzyl-*N*-( $\alpha$ -methylbenzyl)amine (161 mg, 0.59 mmol) in THF (16 mL) and **21** (100 mg, 0.24 mmol) in THF (2 mL) gave a 45:5:45:5 mixture of **35**:**36**:**41**:**42**. Purification by chromatography (1% Et<sub>2</sub>O in pentane) gave (1*R*,2*R*,3*R*, $\alpha$ *S*)-**35** as a colourless oil (60 mg, 40%, >98% de);  $[\alpha]_D^{24}$  -22.6 (*c* 1.0 in CHCl<sub>3</sub>). Further elution gave (1*S*,2*S*,3*S*, $\alpha$ *R*)-**41** as a colourless oil (59 mg, 36%, >98% de);  $[\alpha]_D^{24}$  +13.1 (*c* 1.0 in CHCl<sub>3</sub>).

***tert*-Butyl (1*S*,2*S*,3*S*, $\alpha$ *R*)-2-*N*-( $\alpha$ -methylbenzyl)amino-3-methoxy-cyclopentane-carboxylate **43****

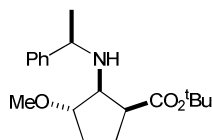

Following *General Procedure 3*, (1*S*,2*S*,3*S*, $\alpha$ *R*)-**39** (310 mg, 0.66 mmol) and DDQ (295 mg, 1.32 mmol) in DCM:H<sub>2</sub>O (5:1, 6 mL) gave, after purification by chromatography (7% Et<sub>2</sub>O in pentane), **43** as a pale yellow oil (207 mg, 98%, >98% de); Found C, 71.2; H, 9.2; N, 4.4%; C<sub>19</sub>H<sub>29</sub>NO<sub>3</sub> requires C, 71.4; H, 9.2; N, 4.4%;  $[\alpha]_D^{24}$  +25.8 (*c* 1.0 in CHCl<sub>3</sub>);  $\nu_{\max}$  (film) 1719 (C=O);  $\delta_H$  (400 MHz, CDCl<sub>3</sub>) 1.33 (3H, d, *J* 6.5, C( $\alpha$ )Me), 1.39-1.49 (1H, m, C(4)*H*<sub>A</sub>), 1.52 (9H, s, CMe<sub>3</sub>), 1.75-1.93 (2H, m, C(5)*H*<sub>2</sub>), 2.05-2.09 (1H, m, C(4)*H*<sub>B</sub>), 2.93-2.96 (1H, m, C(1)*H*), 3.03-3.05 (1H, m, C(2)*H*), 3.20 (3H, s, OMe), 3.61 (1H, app dd, *J* 6.5, 5.1, C(3)*H*), 3.87 (1H, q, *J* 6.5, C( $\alpha$ )*H*), 7.19-7.34 (5H, m, *Ph*);  $\delta_C$  (100 MHz, CDCl<sub>3</sub>) 23.4, 23.8, 27.1, 27.2, 45.5, 55.9, 56.0, 64.8, 79.3, 85.0, 125.7, 125.9, 127.4, 144.6, 173.2; *m/z* (ESI<sup>+</sup>) 320 ([M+H]<sup>+</sup>, 100%); HRMS (ESI<sup>+</sup>) found 320.2223; C<sub>19</sub>H<sub>30</sub>NO<sub>3</sub> ([M+H]<sup>+</sup>) requires 320.2226.

***tert*-Butyl (1*R*,2*S*,3*S*, $\alpha$ *R*)-2-*N*-( $\alpha$ -methylbenzyl)amino-3-methoxy-cyclopentane-carboxylate **44****

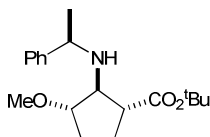

Following *General Procedure 3*, (1*R*,2*S*,3*S*, $\alpha$ *R*)-**40** (210 mg, 0.45 mmol) and DDQ (203 mg, 0.90 mmol) in DCM/H<sub>2</sub>O (5:1, 6 mL) gave, after purification by chromatography (15% Et<sub>2</sub>O in pentane), **44** as a pale yellow oil (141 mg, 98%, >98% de);  $[\alpha]_D^{24}$  +8.8 (*c* 1.0 in CHCl<sub>3</sub>);  $\nu_{\max}$  (film) 1720 (C=O);  $\delta_H$  (400 MHz, CDCl<sub>3</sub>) 1.37 (3H, d, *J* 6.6, C( $\alpha$ )Me), 1.43 (9H, s, CMe<sub>3</sub>), 1.62-1.71 (1H, m, C(4)*H*<sub>A</sub>), 1.77-1.94 (3H, m, C(4)*H*<sub>B</sub>, C(5)*H*<sub>2</sub>), 2.44-2.50 (1H, m, C(1)*H*), 3.12 (3H, s, OMe), 3.20-3.22 (1H, m, C(2)*H*), 3.35-3.41 (1H, m, C(3)*H*), 3.91 (1H, q, *J* 6.6, C( $\alpha$ )*H*), 7.20-7.35 (5H, m, *Ph*);  $\delta_C$  (100 MHz, CDCl<sub>3</sub>) 24.7, 25.6, 28.0, 29.1, 51.0, 56.5, 56.6, 65.5, 80.3, 87.6, 126.6, 126.7, 128.3, 145.8, 174.2; *m/z* (ESI<sup>+</sup>) 320 ([M+H]<sup>+</sup>, 100%); HRMS (ESI<sup>+</sup>) found 320.2230; C<sub>19</sub>H<sub>30</sub>NO<sub>3</sub> ([M+H]<sup>+</sup>) requires 320.2226.

***tert*-Butyl (1*S*,2*S*,3*S*)-2-amino-3-methoxy-cyclopentane-carboxylate (1*S*,2*S*,3*S*)-**45****

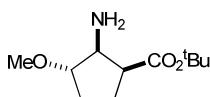

Following *General Procedure 4*, Pd(OH<sub>2</sub>)/C (50 mg, 50% w/w) and **43** (100 mg, 0.31 mmol) in MeOH (5 mL) gave (1*S*,2*S*,3*S*)-**45** as a colourless oil (60 mg, 90%, >98% de);  $[\alpha]_D^{24}$  +42.4 (*c* 0.7 in CHCl<sub>3</sub>);  $\nu_{\max}$  (film) 1724 (C=O);  $\delta_H$  (400 MHz, CDCl<sub>3</sub>) 1.47 (9H, s, CMe<sub>3</sub>), 1.55-1.60 (1H, m, C(4)*H*<sub>A</sub>), 1.88-2.01 (2H, m, C(5)*H*<sub>2</sub>), 2.08-2.16 (1H, m, C(4)*H*<sub>B</sub>), 2.89-2.95 (1H, m, C(1)*H*), 3.35 (3H, s, OMe), 3.40-3.45 (1H, m, C(2)*H*), 3.54-3.57 (1H, m, C(3)*H*);  $\delta_C$  (100 MHz, CDCl<sub>3</sub>) 23.5, 28.0, 28.3, 48.2, 56.9, 58.6, 80.4, 88.3, 173.5; *m/z* (ESI<sup>+</sup>) 216 ([M+H]<sup>+</sup>, 100%); HRMS (ESI<sup>+</sup>) found 216.1596; C<sub>11</sub>H<sub>21</sub>NO<sub>3</sub> ([M+H]<sup>+</sup>) requires 216.1599.

***tert*-Butyl (1*R*,2*R*,3*R*)-2-amino-3-methoxy-cyclopentane-carboxylate (1*R*,2*R*,3*R*)-**45****

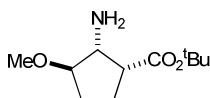

Following *General Procedure 4*, Pd(OH<sub>2</sub>)/C (124 mg, 50% w/w) and (1*R*,2*R*,3*R*, $\alpha$ *S*)-**33** (248 mg, 0.60 mmol) in MeOH (10 mL) gave (1*R*,2*R*,3*R*)-**45** as a colourless oil (115 mg, 89%, >98% de);  $[\alpha]_D^{24}$  -60.5 (*c* 1.0 in CHCl<sub>3</sub>).

***tert*-Butyl (1*R*,2*S*,3*S*)-2-amino-3-methoxy-cyclopentane-carboxylate (1*R*,2*S*,3*S*)-46**

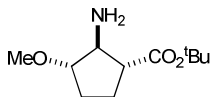

Following *General Procedure 4*, Pd(OH<sub>2</sub>)/C (64 mg, 50% w/w) and **44** (127 mg, 0.40 mmol) in MeOH (5 mL) gave (1*R*,2*S*,3*S*)-**46** as a colourless oil (83 mg, 96%, >98% de);  $[\alpha]_D^{24}$  -10.0 (*c* 1.0 in CHCl<sub>3</sub>);  $\nu_{\max}$  (film) 3400-3300 (N-H), 1725 (C=O);  $\delta_H$  (400 MHz, CDCl<sub>3</sub>) 1.44 (9H, s, CMe<sub>3</sub>), 1.55-1.59 (1H, m, C(4)*H*<sub>A</sub>), 1.81-2.01 (3H, m, C(4)*H*<sub>B</sub>, C(5)*H*<sub>2</sub>), 2.32-2.40 (1H, m, C(1)*H*), 3.29-3.23 (1H, m, C(2)*H*), 3.34 (3H, s, OMe), 3.36-3.41 (1H, m, C(3)*H*);  $\delta_C$  (100 MHz, CDCl<sub>3</sub>) 23.7, 28.1, 27.8, 28.1, 50.8, 57.3, 60.8, 80.5, 95.7, 173.7; *m/z* (ESI<sup>+</sup>) 216 ([M+H]<sup>+</sup>, 100%); HRMS (ESI<sup>+</sup>) found 216.1590; C<sub>11</sub>H<sub>21</sub>NO<sub>3</sub> ([M+H]<sup>+</sup>) requires 216.1600.

***tert*-Butyl (1*S*,2*R*,3*R*)-2-amino-3-methoxy-cyclopentane-carboxylate (1*S*,2*R*,3*R*)-46**

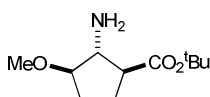

Following *General Procedure 4*, Pd(OH<sub>2</sub>)/C (80 mg, 50% w/w) and (1*S*,2*R*,3*R*, $\alpha$ *S*)-**34** (160 mg, 0.39 mmol) in MeOH (5 mL) gave (1*S*,2*R*,3*R*)-**46** as a colourless oil (79 mg, 94%, >98% de);  $[\alpha]_D^{24}$  +10.4 (*c* 1.0 in CHCl<sub>3</sub>).

**(1*S*,2*S*,3*S*)-2-Amino-3-methoxy-cyclopentane-carboxylic acid (1*S*,2*S*,3*S*)-47**

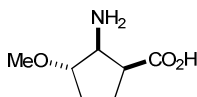

Following *General Procedure 5*, (1*S*,2*S*,3*S*)-**45** (60 mg, 0.28 mmol) and TFA (1 mL) in DCM (1 mL) gave (1*S*,2*S*,3*S*)-**47** as a white crystalline solid (27 mg, 75%); mp 187-188 °C;  $[\alpha]_D^{24}$  +77.1 (*c* 1.0 in H<sub>2</sub>O);  $\nu_{\max}$  (film) 3500-3300 (O-H, N-H), 1710 (C=O);  $\delta_H$  (400 MHz, D<sub>2</sub>O) 1.51-1.59 (1H, m, C(4)*H*<sub>A</sub>), 1.75-1.85 (1H, m, C(5)*H*<sub>A</sub>), 2.03-2.14 (2H, m, C(4)*H*<sub>B</sub>, C(5)*H*<sub>B</sub>), 2.87-2.92 (1H, m, C(1)*H*), 3.28 (3H, s, OMe), 3.45-3.48 (1H, m, C(2)*H*), 3.91-3.96 (1H, m, C(3)*H*);  $\delta_C$  (125 MHz, D<sub>2</sub>O) 26.5, 28.0, 45.1, 57.1, 57.3, 84.2, 180.4; *m/z* (ESI<sup>-</sup>) 158 ([M-H]<sup>-</sup>, 100%); HRMS (ESI<sup>-</sup>) found 158.0817; C<sub>7</sub>H<sub>12</sub>NO<sub>3</sub> ([M-H]<sup>-</sup>) requires 158.0817.

**(1*R*,2*R*,3*R*)-2-Amino-3-methoxy-cyclopentane-carboxylic acid (1*R*,2*R*,3*R*)-47**

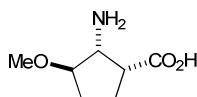

Following *General Procedure 5*, (1*R*,2*R*,3*R*)-**45** (115 mg, 0.53 mmol) and TFA (1 mL) in DCM (1 mL) gave (1*R*,2*R*,3*R*)-**47** as a colourless crystalline solid (52 mg, 77%, >98% de);  $[\alpha]_{\text{D}}^{24}$   $-76.4$  (*c* 1.0 in H<sub>2</sub>O).

**(1*R*,2*S*,3*S*)-2-Amino-3-methoxy-cyclopentane-carboxylic acid (1*R*,2*S*,3*S*)-**48****

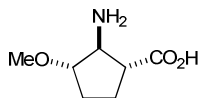

Following *General Procedure 5*, (1*R*,2*S*,3*S*)-**46** (83 mg, 0.38 mmol) and TFA (1 mL) in DCM (1 mL) gave (1*R*,2*S*,3*S*)-**48** as a white crystalline solid (30 mg, 60%, >98% de); mp 171-172 °C;  $[\alpha]_{\text{D}}^{24}$   $-16.9$  (*c* 1.0 in H<sub>2</sub>O);  $\nu_{\text{max}}$  (film) 3500-3300 (O-H, N-H), 1710 (C=O);  $\delta_{\text{H}}$  (400 MHz, D<sub>2</sub>O) 1.56-1.65 (1H, m, C(4)*H*<sub>A</sub>), 1.69-1.80 (1H, m, C(5)*H*<sub>A</sub>), 1.98-2.05 (2H, m, C(4)*H*<sub>B</sub>, C(5)*H*<sub>B</sub>), 2.59-2.66 (1H, m, C(1)*H*), 3.29 (3H, s, OMe), 3.50-3.56 (1H, m, C(2)*H*), 3.76-3.83 (1H, m, C(3)*H*);  $\delta_{\text{C}}$  (100 MHz, D<sub>2</sub>O) 25.8, 28.1, 49.0, 57.2, 59.6, 84.6, 180.8; *m/z* (ESI<sup>-</sup>) 158 ([M-H]<sup>-</sup>, 100%), HRMS (ESI<sup>-</sup>) found 158.0819; C<sub>7</sub>H<sub>12</sub>NO<sub>3</sub> ([M-H]<sup>-</sup>) requires 158.0817.

**(1*S*,2*R*,3*R*)-2-Amino-3-methoxy-cyclopentane-carboxylic acid (1*S*,2*R*,3*R*)-**48****

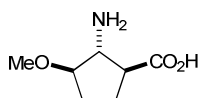

Following *General Procedure 5*, (1*S*,2*R*,3*R*)-**46** (79 mg, 0.37 mmol) and TFA (1 mL) in DCM (1 mL) gave (1*S*,2*R*,3*R*)-**48** as a colourless solid (31 mg, 65%, >98% de);  $[\alpha]_{\text{D}}^{24}$   $+17.0$  (*c* 1.0 in H<sub>2</sub>O).
